# Supplementary material for: Challenging fabrication of hollow ceramic fiber supported Cu3(BTC)2 membrane for hydrogen separation
Source: Royal Society of Chemistry journal article supplement (doi:10.1039/c2jm16371c), 2012-01-01
Supplement: c2jm16371c.pdf [file c2jm16371c.pdf]

## Supporting Information

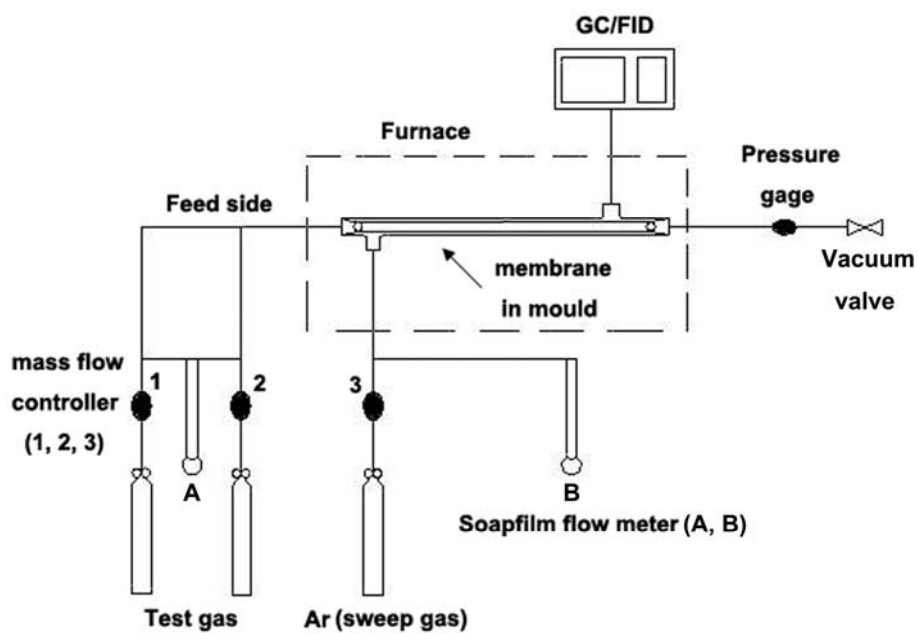

**Fig. S1** The experimental set-up scheme for gas separation with hollow ceramic fiber supported  $\text{Cu}_3(\text{BTC})_2$  membranes.

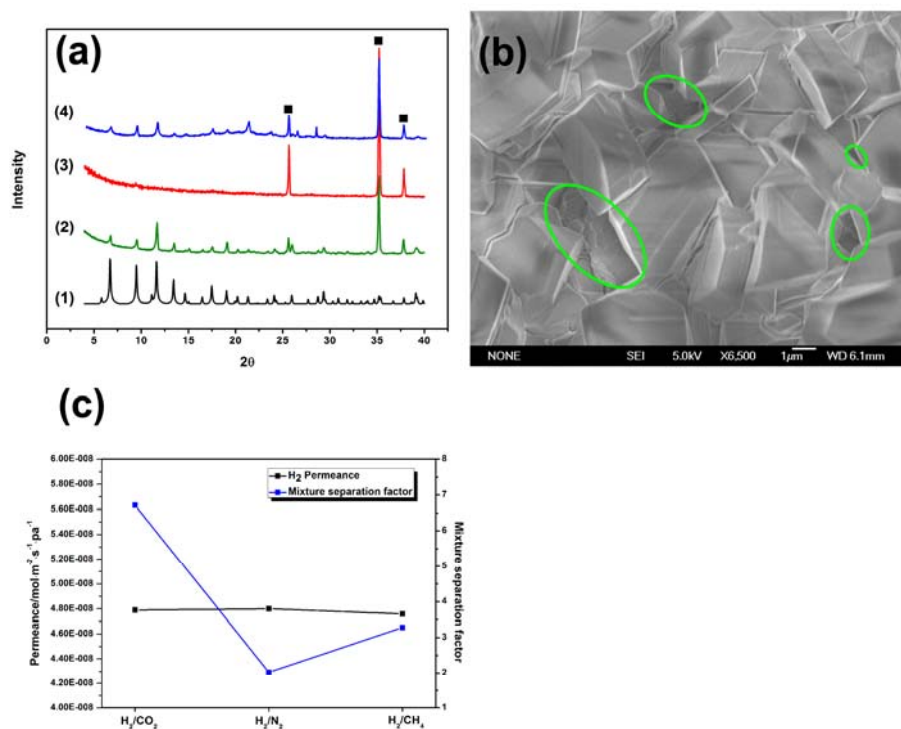

**Fig. S2** (a) XRD patterns of simulated Cu<sub>3</sub>(BTC)<sub>2</sub> (1), Cu<sub>3</sub>(BTC)<sub>2</sub> seeded layer without chitosan (2), α-Al<sub>2</sub>O<sub>3</sub> HCFs (3), and Cu<sub>3</sub>(BTC)<sub>2</sub> membrane on α-Al<sub>2</sub>O<sub>3</sub> HCFs without chitosan (4) (peaks from α-Al<sub>2</sub>O<sub>3</sub> HCFs are marked by ■). (b) SEM image of Cu<sub>3</sub>(BTC)<sub>2</sub> membrane without chitosan (Pinholes of Cu<sub>3</sub>(BTC)<sub>2</sub> membrane are indicated by green circles), and (c) the gas separation performance of Cu<sub>3</sub>(BTC)<sub>2</sub> membrane on α-Al<sub>2</sub>O<sub>3</sub> HCFs without chitosan (H<sub>2</sub>/CO<sub>2</sub>, H<sub>2</sub>/N<sub>2</sub> and H<sub>2</sub>/CH<sub>4</sub> binary gas mixtures in the volume ratio 1:1 at 40 °C with a pressure drop of 1 atm).
